# Supplementary material for: Effects of Vitamin D Supplementation on Cardiovascular and Glycemic Biomarkers
Source: PubMed Central journal article supplement — J Am Heart Assoc. 2021 May 7;10(10):e017727. doi: 10.1161/JAHA.120.017727 (PMC8200713; doi:10.1161/jaha.120.017727), 2021-05-07
Supplement: JAH3-10-e017727-s001.pdf [file JAH3-10-e017727-s001.pdf]

## **SUPPLEMENTAL MATERIAL**

**Table S1. Number of participants (n) at baseline and 6 months for individual biomarkers.**

| Biomarker      | Baseline | Month 6 |
|----------------|----------|---------|
| hsCRP          | 281      | 281     |
| Glucose        | 282      | 282     |
| Insulin        | 281      | 281     |
| HOMA-IR        | 281      | 279     |
| NT-proBNP      | 281      | 281     |
| Renin          | 251      | 274     |
| Aldosterone    | 264      | 252     |
| Lipid profile* | 282      | 282     |
| 25-OH-D        | 288      | 277     |

\*Lipid profile includes total cholesterol, triglycerides, high-density lipoprotein, low-density lipoprotein; hsCRP, high-sensitivity C-Reactive Protein; Glucose, Fasting Plasma Glucose; HOMA-IR, Homeostatic Model Assessment of Insulin Resistance; NT-proBNP, N-terminal pro-B-type natriuretic peptide; 25-OH-D, 25-hydroxyvitamin D.

**Table S2. Circulating glycemic, inflammatory, neurohormonal, and lipid biomarkers at baseline and 6-month follow-up, stratified by baseline vitamin D level.**

| Biomarker                                         | Low-dose Vitamin D Group |                      |                    | High-dose Vitamin D Group |                      |                    | *P-value |
|---------------------------------------------------|--------------------------|----------------------|--------------------|---------------------------|----------------------|--------------------|----------|
|                                                   | Baseline                 | Month 6              | Change             | Baseline                  | Month 6              | Change             |          |
| <i>Baseline 25-OH-D ≤ 10 ng/ml</i>                |                          |                      |                    |                           |                      |                    |          |
| hsCRP (mg/L)                                      | 2.6 (1.0, 12.5)          | 2.9 (1.1, 5.6)       | -0.2 (-1.7, 0.5)   | 2.0 (0.7, 4.1)            | 1.7 (0.7, 3.5)       | 0.03 (-1.0, 1.0)   | 0.4      |
| Glucose (mg/dL)                                   | 77.0 (71.0, 88.0)        | 77.0 (68.0, 94.0)    | 0.0 (-10.0, 4.0)   | 79.0 (70.0, 92.0)         | 81.0 (73.0, 92.0)    | 4.0 (-8.5, 13.0)   | 0.3      |
| Insulin (μU/mL)                                   | 13.0 (9.2, 23.6)         | 9.1 (6.0, 23.0)      | -0.2 (-7.6, 4.0)   | 8.0 (4.4, 16.3)           | 11.6 (5.9, 18.2)     | 0.5 (-4.4, 5.7)    | 0.5      |
| HOMA-IR                                           | 2.7 (1.5, 6.5)           | 1.8 (0.9, 5.3)       | -0.2 (-1.3, 0.3)   | 1.5 (0.8, 3.5)            | 2.4 (1.1, 4.0)       | 0.06 (-1.1, 1.0)   | 0.4      |
| NT-proBNP (pg/mL)                                 | 27.8 (7.7, 42.4)         | 21.7 (9.8, 67.1)     | 1.5 (-6.3, 18.3)   | 23.6 (11.8, 42.2)         | 21.4 (7.1, 39.4)     | -5.6 (-17.6, 9.0)  | 0.09     |
| Renin (pg/mL)                                     | 6.3 (3.9, 16.1)          | 7.6 (3.3, 14.5)      | -1.2 (-3.5, 3.1)   | 7.3 (3.5, 10.6)           | 7.0 (5.1, 16.3)      | 0.2 (-1.2, 4.2)    | 0.3      |
| Aldosterone (ng/dL)                               | 10.9 (8.3, 13.1)         | 9.6 (7.2, 11.9)      | -0.5 (-2.9, 1.6)   | 9.4 (6.3, 12.6)           | 10.9 (6.3, 13.9)     | -0.03 (-1.7, 3.8)  | 0.3      |
| Total Cholesterol (mg/dL)                         | 172.0 (150.0, 198.0)     | 160.0 (143.0, 200.0) | -8.0 (-15.0, 8.0)  | 162.0 (152.0, 193.0)      | 169.0 (146.0, 205.0) | 8.0 (-13.0, 21.0)  | 0.08     |
| Triglyceride (mg/dL)                              | 102.0 (72.0, 150.0)      | 94.0 (68.0, 134.0)   | -18.0 (-28.0, .0)  | 85.0 (70.0, 110.0)        | 97.0 (73.0, 146.0)   | 7.0 (-19.0, 37.0)  | 0.04     |
| HDL (mg/dL)                                       | 49.0 (44.0, 60.0)        | 54.0 (44.0, 64.0)    | 1.5 (-2.0, 7.8)    | 60.0 (53.0, 74.0)         | 61.0 (52.0, 72.0)    | 1.0 (-7.5, 8.0)    | 0.3      |
| LDL (mg/dL)                                       | 94.0 (67.0, 115.0)       | 94.0 (68.0, 105.0)   | -5.0 (-15.3, 5.3)  | 86.0 (68.0, 100.0)        | 86.0 (70.0, 110.0)   | 4.0 (-6.5, 16.5)   | 0.1      |
| <i>Baseline 25-OH-D &gt; 10 and &lt; 20 ng/ml</i> |                          |                      |                    |                           |                      |                    |          |
| hsCRP (mg/L)                                      | 1.9 (1.1, 4.7)           | 1.9 (0.9, 3.9)       | -0.3 (-1.4, 0.5)   | 1.2 (0.5, 2.5)            | 1.3 (0.7, 2.5)       | -0.2 (-0.7, 0.8)   | 0.5      |
| Glucose (mg/dL)                                   | 79.0 (70.0, 90.0)        | 80.0 (72.0, 91.0)    | -1.0 (-10.0, 13.0) | 79.0 (68.0, 89.0)         | 80.0 (70.0, 88.0)    | -0.5 (-10.3, 13.0) | 0.9      |
| Insulin (μU/mL)                                   | 11.2 (6.1, 22.2)         | 9.5 (6.2, 14.9)      | -0.2 (-7.1, 3.6)   | 9.3 (6.1, 14.9)           | 11.0 (6.2, 18.3)     | 1.1 (-3.1, 5.0)    | 0.09     |
| HOMA-IR                                           | 2.2 (1.1, 4.4)           | 1.9 (1.2, 3.3)       | -0.04 (-1.6, 1.2)  | 1.6 (1.1, 3.1)            | 2.1 (1.2, 3.3)       | 0.1 (-0.6, 1.2)    | 0.2      |
| NT-proBNP (pg/mL)                                 | 20.8 (9.1, 48.8)         | 14.0 (8.1, 39.6)     | -0.07 (20.0, 8.7)  | 19.0 (10.5, 38.4)         | 15.4 (5.0, 33.2)     | -3.8 (-9.8, 0.6)   | 0.5      |
| Renin (pg/mL)                                     | 9.8 (3.7, 18.5)          | 8.4 (4.5, 14.5)      | -0.4 (-7.0, 4.1)   | 9.6 (3.4, 15.1)           | 8.8 (3.7, 14.5)      | 0.0 (-3.4, 4.0)    | 0.7      |
| Aldosterone (ng/dL)                               | 10.9 (7.8, 13.6)         | 9.9 (7.5, 14.4)      | -0.7 (-2.9, 2.6)   | 8.8 (6.5, 13.9)           | 11.2 (8.1, 15.0)     | 0.7 (-1.0, 4.5)    | 0.06     |
| Total Cholesterol (mg/dL)                         | 178.0 (153.0, 196.0)     | 175.0 (152.0, 199.0) | 2.0 (-15.0, 16.0)  | 173.0 (152.0, 187.0)      | 179.0 (156.0, 195.0) | 7.5 (-5.0, 19.0)   | 0.07     |
| Triglyceride (mg/dL)                              | 98.0 (74.0, 148.0)       | 98.0 (70.0, 135.0)   | -5.0 (-29.0, 20.0) | 89.0 (68.0, 125.0)        | 100.0 (68.0, 131.0)  | 7.0 (-6.0, 28.0)   | 0.045    |
| HDL (mg/dL)                                       | 50.0 (45.0, 59.0)        | 52.0 (45.0, 64.0)    | 2.0 (-2.0, 7.0)    | 50.0 (44.0, 59.0)         | 52.0 (46.0, 64.0)    | 3.0 (-1.0, 9.0)    | 0.2      |
| LDL (mg/dL)                                       | 97.0 (76.0, 122.0)       | 96.0 (73.0, 115.0)   | 2.0 (-16.0, 13.0)  | 96.0 (74.0, 114.0)        | 100.0 (76.0, 113.0)  | 2.0 (-8.8, 11.0)   | 0.7      |
| <i>Baseline 25-OH-D ≥ 20 ng/ml</i>                |                          |                      |                    |                           |                      |                    |          |
| hsCRP (mg/L)                                      | 1.4 (0.5, 2.3)           | 1.1 (0.4, 3.3)       | 0.1 (-0.6, 1.3)    | 1.1 (0.5, 2.0)            | 1.2 (0.6, 3.6)       | 0.1 (-0.4, 0.8)    | 0.9      |
| Glucose (mg/dL)                                   | 78.0 (72.0, 100.0)       | 78.0 (70.0, 96.0)    | 2.0 (-9.5, 8.5)    | 75.0 (71.0, 84.0)         | 79.0 (69.0, 94.0)    | 1.0 (-8.5, 12.8)   | 0.6      |
| Insulin (μU/mL)                                   | 9.1 (5.5, 17.1)          | 9.3 (6.6, 20.4)      | -0.3 (-2.7, 4.4)   | 8.3 (5.4, 15.2)           | 9.5 (5.4, 19.6)      | 1.0 (-2.4, 6.6)    | 0.7      |
| HOMA-IR                                           | 1.5 (1.0, 4.5)           | 1.8 (1.3, 4.1)       | 0.07 (-0.5, 1.0)   | 1.7 (0.9, 3.0)            | 1.9 (1.0, 4.1)       | 0.009 (-0.5, 1.3)  | 0.9      |
| NT-proBNP (pg/mL)                                 | 21.0 (14.0, 41.0)        | 14.8 (9.1, 47.0)     | -4.0 (16.4, 2.9)   | 22.0 (14.0, 38.0)         | 22.8 (12.2, 43.2)    | -1.2 (-11.4, 9.9)  | 0.2      |
| Renin (pg/mL)                                     | 8.6 (5.0, 14.9)          | 9.2 (6.0, 14.7)      | -0.3 (-5.3, 7.5)   | 10.6 (6.8, 20.1)          | 9.7 (4.3, 14.2)      | -1.4 (-8.6, 2.3)   | 0.2      |
| Aldosterone (ng/dL)                               | 11.2 (7.3, 16.6)         | 12.3 (8.9, 17.9)     | 0.3 (-3.2, 4.4)    | 11.7 (7.8, 18.2)          | 10.2 (7.5, 15.4)     | -0.7 (-4.5, 2.8)   | 0.6      |
| Total Cholesterol (mg/dL)                         | 162.0 (140.0, 192.0)     | 164.0 (151.0, 186.0) | -2.0 (-9.5, 19.5)  | 172.0 (154.0, 190.0)      | 175.0 (152.0, 190.0) | 1.5 (-13.0, 7.3)   | 0.5      |
| Triglyceride (mg/dL)                              | 99.0 (65.0, 143.0)       | 99.0 (62.0, 126.0)   | -5.0 (-30.0, 6.5)  | 88.0 (62.0, 120.0)        | 94.0 (74.0, 135.0)   | 3.5 (-10.8, 24.8)  | 0.03     |
| HDL (mg/dL)                                       | 49.0 (45.0, 56.0)        | 53.0 (49.0, 62.0)    | 5.0 (0.5, 9.5)     | 53.0 (47.0, 63.0)         | 54.0 (47.0, 63.0)    | -1.0 (-5.8, 6.0)   | 0.003    |
| LDL (mg/dL)                                       | 82.0 (72.0, 100.0)       | 86.0 (72.0, 113.0)   | 2.0 (-9.0, 11.5)   | 96.0 (82.0, 111.0)        | 96.0 (74.0, 108.0)   | -4.5 (-12.8, 1.5)  | 0.1      |

Data presented as median (lower quartile, upper quartile); 25-OH-D, 25-hydroxyvitamin D; hsCRP, high-sensitivity C-Reactive Protein; HOMA-IR, Homeostatic Model Assessment of Insulin Resistance; NT-proBNP, N-terminal pro-B-type natriuretic peptide; HDL, High-density Lipoprotein; LDL, Low-density Lipoprotein. \*P-value refers to the difference between the change for low-dose group vs. change for high-dose group.

**Table S3. Circulating glycemc, inflammatory, neurohormonal, and lipid biomarkers at baseline and 6-month follow-up, stratified by vitamin D status at the end of the study.**

| Biomarker                          | Low-dose Vitamin D Group |                      |                     | High-dose Vitamin D Group |                      |                    |
|------------------------------------|--------------------------|----------------------|---------------------|---------------------------|----------------------|--------------------|
|                                    | Baseline                 | Month 6              | Change              | Baseline                  | Month 6              | Change             |
| <i>Final 25-OH-D &gt; 20 ng/ml</i> |                          |                      |                     |                           |                      |                    |
| hsCRP (mg/L)                       | 1.9 (0.9, 3.3)           | 1.5 (0.7, 2.4)       | -0.3 (-1.2, 0.5)    | 1.2 (0.6, 3.2)            | 1.3 (0.7, 3.2)       | 0.02 (-0.6, 0.8)   |
| Glucose (mg/dL)                    | 81.0 (74.0, 96.0)        | 79.0 (69.0, 92.0)    | -1.0 (-12.0, 8.0)   | 78.0 (69.0, 87.0)         | 79.0 (70.0, 88.0)    | 0.5 (-9.0, 12.8)   |
| Insulin (μU/mL)                    | 9.8 (5.3, 18.3)          | 7.5 (5.7, 14.5)      | -0.4 (-5.2, 4.2)    | 8.3 (5.1, 14.0)           | 7.9 (5.2, 14.5)      | -0.1 (-3.4, 4.3)   |
| HOMA-IR                            | 1.7 (1.1, 3.9)           | 1.5 (1.0, 3.4)       | -0.06 (-1.2, 1.1)   | 1.4 (0.9, 2.9)            | 1.5 (1.0, 2.9)       | -0.05 (-0.7, 0.9)  |
| NT-proBNP (pg/mL)                  | 20.8 (8.6, 40.2)         | 14.8 (9.5, 41.0)     | -0.07 (-16.1, 9.8)  | 20.5 (10.6, 39.3)         | 18.3 (6.9, 37.1)     | -2.7 (-11.4, 5.5)  |
| Renin (pg/mL)                      | 10.2, (4.5, 17.5)        | 10.3 (6.7, 15.5)     | 0.0 (-6.3, 5.1)     | 8.9 (4.5, 14.5)           | 9.0 (5.2, 15.6)      | 0.05 (-3.4, 4.7)   |
| Aldosterone (ng/dL)                | 12.3 (8.5, 15.7)         | 11.7 (9.2, 16.3)     | -0.05 (-4.5, 3.0)   | 9.4 (6.5, 14.1)           | 11.7 (8.1, 14.9)     | 0.3 (-1.8, 3.9)    |
| Total Cholesterol (mg/dL)          | 168.0 (144.0, 191.0)     | 166.0 (147.0, 188.0) | -2.0 (-11.0, 9.0)   | 170.0 (152.0, 188.0)      | 175.0 (147.0, 196.0) | 5.0 (-12.5, 17.0)  |
| Triglyceride (mg/dL)               | 99.0 (70.0, 147.0)       | 92.0 (65.0, 124.0)   | -6.0 (-33.0, 11.0)  | 88.0 (68.0, 122.0)        | 98.0 (70.0, 140.0)   | 7.0 (-15.0, 31.0)  |
| HDL (mg/dL)                        | 53.0 (45.0, 59.0)        | 53.0 (48.0, 64.0)    | 2.0 (-2.0, 7.0)     | 54.0 (46.0, 63.0)         | 54.0 (46.0, 63.0)    | 1.0 (-4.0, 6.0)    |
| LDL (mg/dL)                        | 83.0 (74.0, 110.0)       | 88.0 (72.0, 113.0)   | 0.0 (-10.0, 9.0)    | 92.0 (75.0, 112.0)        | 95.0 (73.0, 112.0)   | -1.5 (-11.8, 13.8) |
| <i>Final 25-OH-D ≤ 20 ng/ml</i>    |                          |                      |                     |                           |                      |                    |
| hsCRP (mg/L)                       | 1.8 (0.7, 5.6)           | 2.4 (0.9, 5.4)       | -0.05 (-1.0, 1.2)   | 1.2 (0.6, 2.2)            | 2.0 (0.7, 3.2)       | -0.2 (-0.5, 1.1)   |
| Glucose (mg/dL)                    | 77.0 (70.0, 89.0)        | 77.0 (69.0, 91.0)    | 0.0 (-8.0, 9.0)     | 82.0 (73.0, 92.0)         | 81.0 (75.0, 94.0)    | 1.0 (-11.0, 13.0)  |
| Insulin (μU/mL)                    | 12.3 (5.9, 28.0)         | 9.8 (7.1, 16.6)      | 0.03 (-7.0, 3.7)    | 11.8 (5.6, 17.2)          | 14.2 (11.3, 23.2)    | 3.7 (-2.6, 9.8)    |
| HOMA-IR                            | 2.3 (1.1, 5.3)           | 1.9 (1.2, 3.5)       | -0.04 (-1.5, 0.6)   | 2.3 (1.3, 4.0)            | 2.8 (2.1, 5.5)       | 0.6 (-0.9, 1.8)    |
| NT-proBNP (pg/mL)                  | 25.0 (10.0, 49.0)        | 14.9 (7.2, 41.7)     | -3.5 (-19.5, 6.4)   | 24.0 (13.0, 41.0)         | 19.9 (6.7, 33.4)     | -6.8 (-17.8, 0.6)  |
| Renin (pg/mL)                      | 9.4 (3.9, 16.1)          | 7.1 (3.7, 13.0)      | -0.6 (-5.8, 3.5)    | 9.2 (3.7, 17.3)           | 6.1 (3.0, 14.0)      | -0.3 (-4.9, 2.5)   |
| Aldosterone (ng/dL)                | 10.6 (7.3, 12.4)         | 9.0 (7.1, 12.9)      | -0.6 (-2.6, 2.4)    | 9.4 (6.9, 14.3)           | 10.0 (6.8, 12.8)     | 0.2 (-1.7, 2.7)    |
| Total Cholesterol (mg/dL)          | 170.0 (152.0, 196.0)     | 175.0 (156.0, 198.0) | 7.0 (-14.5, 20.5)   | 167.0 (159.0, 189.0)      | 176.0 (162.0, 205.0) | 11.0 (-3.0, 22.0)  |
| Triglyceride (mg/dL)               | 103.0 (74.0, 148.0)      | 101.0 (71.0, 144.0)  | -10.0 (-25.0, 19.0) | 88.0 (68.0, 113.0)        | 94.0 (66.0, 121.0)   | 7.0 (-16.0, 29.0)  |
| HDL (mg/dL)                        | 49.0 (45.0, 58.0)        | 53.0 (45.0, 65.0)    | 4.0 (-1.0, 9.5)     | 53.0 (47.0, 64.0)         | 59.0 (50.0, 70.0)    | 6.0 (-3.0, 10.0)   |
| LDL (mg/dL)                        | 95.0 (71.0, 122.0)       | 95.0 (73.0, 113.0)   | 2.0 (-13.5, 14.0)   | 94.0 (80.0, 112.0)        | 95.0 (72.0, 107.0)   | 3.0 (-4.0, 11.0)   |

Data presented as median (lower quartile, upper quartile); 25-OH-D, 25-hydroxyvitamin D; hsCRP, high-sensitivity C-Reactive Protein; HOMA-IR, Homeostatic Model Assessment of Insulin Resistance; NT-proBNP, N-terminal pro-B-type natriuretic peptide; HDL, High-density Lipoprotein; LDL, Low-density Lipoprotein. \**P*-value refers to the difference between the change for low-dose group vs. change for high-dose group.

**Table S4. General characteristics of studies investigating effects of vitamin D supplementation on LDL.**

| Author                     | Year | Country     | Subject Characteristics | Mean Age, Control | Mean Age, Intervention | Sex (n) male | Intervention (n) | Control (n) | Baseline 25 OH-D (ng/mL)                                                  |                | Vit D Dose (IU/day) | Duration (Weeks) | Delta, Intervention                               | Delta, Control | p-value |
|----------------------------|------|-------------|-------------------------|-------------------|------------------------|--------------|------------------|-------------|---------------------------------------------------------------------------|----------------|---------------------|------------------|---------------------------------------------------|----------------|---------|
|                            |      |             |                         |                   |                        |              |                  |             | Intervention                                                              | Control        |                     |                  |                                                   |                |         |
| Angelloti <sup>26</sup>    | 2019 | USA         | T2D                     | 60.3              | 60.1                   | 89           | 66               | 61          | 25.8 (10.3)                                                               | 27.5 (12.0)    | 4000                | 48               | -0.07 (3.3)                                       | -2.0 (3.4)     | 0.7     |
| Dastorani <sup>19</sup>    | 2018 | Iran        | PCOS                    | 30.1              | 29.9                   | 0            | 20               | 20          | 10.5 (2.5)                                                                | 11.0 (2.4)     | 7142                | 8                | -4.5 (10.3)                                       | 2.5 (10.6)     | 0.04    |
| Foroozanfard <sup>11</sup> | 2017 | Iran        | PCOS                    | NR                | NR                     | 0            | 60               | 30          | 13.5 (3.1) (high dose)<br>14.0 (4.6) (low dose)                           | 14.0 (3.5)     | 4000                | 12               | -10.8 (8.3) (high dose)<br>-5.7 (21.9) (low dose) | 6.8 (28.2)     | 0.005   |
| Ghaderi <sup>13</sup>      | 2017 | Iran        | MMT                     | 42.5              | 40.1                   | NR           | 34               | 34          | 13.9 (4.5)                                                                | 13.5 (4.5)     | 3571                | 12               | -11.1 (17.9)                                      | 5.9 (27.5)     | 0.004   |
| Dalan <sup>21</sup>        | 2016 | Singapore   | T2D                     | 54.8              | 52.2                   | 33           | 33               | 31          | 18.0 (7.0)                                                                | 17.0 (11.0)    | 4000                | 16               | 0.1 (0.5)                                         | -0.1 (0.6)     | 0.2     |
| Maktabi <sup>14</sup>      | 2017 | Iran        | PCOS                    | 23.1              | 22.0                   | 0            | 35               | 35          | 12.8 (4.5)                                                                | 14.5 (5.1)     | 3571                | 12               | -6.3 (24.1)                                       | 3.2 (26.8)     | 0.1     |
| Tabassi <sup>15</sup>      | 2017 | Iran        | Endometrial hyperplasia | 43.2              | 41.5                   | 0            | 30               | 30          | NR                                                                        | NR             | 3571                | 12               | 0.9 (4.0)                                         | 3.3 (4.0)      | 0.7     |
| Sepehrmanesh <sup>17</sup> | 2015 | Iran        | MDD                     | 36.1              | 36.5                   | 6            | 20               | 20          | 13.6 (7.9) µg/L                                                           | 9.2 (6.0) µg/L | 7142                | 8                | 4.0 (17.0)                                        | -3.0 (16.0)    | 0.3     |
| Asemi <sup>18</sup>        | 2015 | Iran        | PCOS, obesity           | 24.3              | 25.0                   | 0            | 26               | 26          | 13.9 (2.0) (Calcium)<br>11.6 (4.7) (Vit D)<br>15.1 (3.6) (Calcium+ Vit D) | 14.0 (4.1)     | 7142                | 8                | -4.5 (20.8)                                       | -2.2 (31.7)    | 0.4     |
| Yousefi Rad <sup>12</sup>  | 2014 | Iran        | T2D                     | 49.9              | 50.0                   | 12           | 28               | 30          | 15.6 (1.9)                                                                | 14.6 (2.2)     | 4000                | 8                | 0.9 (7.2)                                         | 1.3 (8.7)      | 1.0     |
| Ryu <sup>16</sup>          | 2014 | South Korea | T2D                     | 56.7              | 54.5                   | NR           | 32               | 30          | 12.3 (3.0)                                                                | 10.7 (2.6)     | 2000                | 24               | 10.2 (17.5)                                       | 0.3 (26.0)     | 0.09    |
| Sollid <sup>23</sup>       | 2014 | Norway      | Prediabetes             | 61.9              | 62.3                   | 314          | 256              | 255         | 23.9 (8.8)                                                                | 24.4 (8.5)     | 2857                | 52               | -0.1 (0.7)                                        | 0.09 (0.66)    | <0.05   |
| Raja-Khan <sup>22</sup>    | 2014 | USA         | PCOS                    | 28.7              | 28.2                   | 0            | 13               | 15          | 19.9 (9.5)                                                                | 22.2 (6.9)     | 12000               | 12               | -0.1 (20.6)                                       | -0.4 (20.9)    | 0.9     |
| Ponda <sup>20</sup>        | 2012 | USA         | Vit D deficient         | 47.4              | 48.4                   | 75           | 76               | 75          | 13.4 (5.3)                                                                | 14.1 (5.7)     | 7142                | 8                | -0.3 (18.6)                                       | -4.1 (20.8)    | 0.1     |
| Rajpathak <sup>10</sup>    | 2010 | USA         | Postmenopausal          | 62.1              | 61.6                   | 0            | 592              | 599         | NR                                                                        | NR             | 400                 | 260              | -6.5 (1.6)                                        | -6.3 (1.7)     | NS      |
| Jorde <sup>24</sup>        | 2009 | Norway      | T2D                     | 54.8              | 57.7                   | 18           | 16               | 16          | 24.0 (5.6)                                                                | 23.4 (8.4)     | 5714                | 26               | -0.1 (0.4)                                        | 0.0 (0.3)      | 0.6     |
| Zittermann <sup>25</sup>   | 2009 | Germany     | Overweight              | 48.8              | 47.4                   | 53           | 82               | 83          | 30.0 (17.5)                                                               | 30.3 (20.1)    | 3332                | 52               | 0.2 (1.0)                                         | -0.09 (0.9)    | 0.2     |

Data are presented as mean (SD). LDL, Low-density Lipoprotein; 25-OH-D, 25-hydroxyvitamin D; IU, International Units; PCOS, Polycystic

Ovarian Syndrome; MMT, Methadone Maintenance Treatment; MDD, Major Depressive Disorder; T2D, Type 2 Diabetes; NR, Not Reported; NS,

Not Significant.

**Table S5. General characteristics of included studies investigating effects of vitamin D supplementation on HOMA-IR.**

| Author                     | Year | Country | Subject Characteristics | Mean Age, Control | Mean Age, Intervention              | Sex (n) male | Intervention (n) | Control (n) | Baseline 25 OH-D (ng/mL)                                                  |                        | Vit D Dose (IU/day)                 | Duration (Weeks) | Delta, Intervention                             | Delta, Control | p-value |
|----------------------------|------|---------|-------------------------|-------------------|-------------------------------------|--------------|------------------|-------------|---------------------------------------------------------------------------|------------------------|-------------------------------------|------------------|-------------------------------------------------|----------------|---------|
|                            |      |         |                         |                   |                                     |              |                  |             | Intervention                                                              | Control                |                                     |                  |                                                 |                |         |
| Seyyed <sup>29</sup>       | 2018 | Iran    | PCOS                    | 22.8              | 26.2                                | 0            | 22               | 22          | 8.65 (4.3)                                                                | 9.8 (5.1)              | 7142                                | 8                | 0.04 (1.2)                                      | 0.3 (1.4)      | 0.3     |
| Maktabi <sup>14</sup>      | 2017 | Iran    | PCOS                    | 23.1              | 22.0                                | 0            | 35               | 35          | 12.8 (4.5)                                                                | 14.5 (5.1)             | 3571                                | 12               | -0.3 (0.8)                                      | 0.6 (1.6)      | 0.003   |
| Ghaderi <sup>13</sup>      | 2017 | Iran    | MMT                     | 42.5              | 40.1                                | NR           | 34               | 34          | 13.9 (4.5)                                                                | 13.5 (4.5)             | 3571                                | 12               | -1.0 (1.3)                                      | -0.2 (0.7)     | 0.003   |
| Jamilian <sup>27</sup>     | 2017 | Iran    | PCOS                    | 25.0              | 26.0 (low dose)<br>28.0 (high dose) | 0            | 60               | 30          | 12.6 (3.4) (low dose)<br>12.6 (2.7) (high dose)                           | 12.9 (2.4) (high dose) | 4000 (high dose)<br>1000 (low dose) | 12               | -0.5 (0.4) (high dose)<br>-0.3 (0.7) (low dose) | 0.1 (2.6)      | 0.004   |
| Tabassi <sup>15</sup>      | 2017 | Iran    | Endometrial hyperplasia | 43.2              | 41.5                                | 0            | 30               | 30          | NR                                                                        | NR                     | 3571                                | 12               | -0.2 (0.1)                                      | 0.3 (0.1)      | 0.006   |
| Foroozanfard <sup>11</sup> | 2017 | Iran    | PCOS                    | NR                | NR                                  | 0            | 60               | 30          | 13.5 (3.1) (high dose)<br>14.0 (4.6) (low dose)                           | 14.0 (3.5)             | 4000                                | 12               | -0.4 (1.0) (low dose)<br>-0.6 (0.6) (high dose) | -0.1 (0.9)     | 0.02    |
| Sepehrmanesh <sup>17</sup> | 2016 | Iran    | MDD                     | 36.1              | 36.5                                | 6            | 20               | 20          | 13.6 (7.9) µg/L                                                           | 9.2 (6.0) µg/L         | 7142                                | 8                | -1.0 (1.5)                                      | 0.6 (2.2)      | 0.01    |
| Osati <sup>28</sup>        | 2016 | Iran    | Vit D deficient         | 38.0              | 38.0                                | 49           | 105              | 105         | 13.8 (3.6) mg/dL                                                          | 13.9 (3.7) mg/dL       | 7142                                | 8                | -0.8 (0.4)                                      | -0.3 (0.3)     | <0.001  |
| Asemi <sup>18</sup>        | 2015 | Iran    | PCOS, obesity           | 24.3              | 25.0                                | 0            | 26               | 26          | 13.9 (2.0) (Calcium)<br>11.6 (4.7) (Vit D)<br>15.1 (3.6) (Calcium+ Vit D) | 14.0 (4.1)             | 7142                                | 8                | -0.7 (2.4) (Calcium +Vit D)                     | 0.8 (1.9)      | 0.04    |
| Yousefi Rad <sup>12</sup>  | 2014 | Iran    | T2D                     | 49.9              | 50.0                                | 12           | 28               | 30          | 15.6 (1.9)                                                                | 14.6 (2.2)             | 4000                                | 8                | -0.1 (0.1)                                      | 0.2 (0.1)      | 0.06    |
| Raja-Khan <sup>22</sup>    | 2014 | USA     | PCOS                    | 28.7              | 28.2                                | 0            | 13               | 15          | 19.9 (9.5)                                                                | 22.2 (6.9)             | 12000                               | 12               | 2.57 (4.9)                                      | -0.5 (4.9)     | 0.2     |
| Jorde <sup>24</sup>        | 2009 | Norway  | T2D                     | 54.8              | 57.7                                | 18           | 16               | 16          | 24.0 (5.6)                                                                | 23.4 (8.4)             | 5714                                | 26               | 0.3 (23.5)                                      | -0.2 (13.7)    | 0.6     |

Data are presented as mean (SD). HOMA-IR, Homeostatic Model Assessment of Insulin Resistance; 25-OH-D, 25-hydroxyvitamin D; IU,

International Units; PCOS, Polycystic Ovarian Syndrome; MMT, Methadone Maintenance Treatment; MDD, Major Depressive Disorder; T2D, Type

2 Diabetes; NR, Not Reported.

**Table S6. General characteristics of included studies investigating effects of vitamin D supplementation on hsCRP.**

| Author                     | Year | Country   | Subject Characteristics  | Mean Age, Control | Mean Age, Intervention          | Sex (n) male | Intervention (n)                | Control (n) | Baseline 25 OH-D (ng/mL)                        |             | Vit D Dose (IU/day)                 | Duration (Weeks) | Delta, Intervention                             | Delta, Control | p-value |
|----------------------------|------|-----------|--------------------------|-------------------|---------------------------------|--------------|---------------------------------|-------------|-------------------------------------------------|-------------|-------------------------------------|------------------|-------------------------------------------------|----------------|---------|
|                            |      |           |                          |                   |                                 |              |                                 |             | Intervention                                    | Control     |                                     |                  |                                                 |                |         |
| Angelloti <sup>26</sup>    | 2019 | USA       | T2D                      | 60.3              | 60.1                            | 89           | 66                              | 61          | 25.8 (10.3)                                     | 27.5 (12.0) | 4000                                | 48               | -0.8 (0.3)                                      | -0.6 (0.3)     | 0.6     |
| Maktabi <sup>30</sup>      | 2018 | Iran      | PCOS                     | 24.8              | 23.8                            | 0            | 30                              | 30          | 10.1 (4.9)                                      | 10.8 (4.6)  | 400                                 | 12               | -0.7 (0.8)                                      | 0.2 (0.8)      | <0.001  |
| Zheng <sup>32</sup>        | 2018 | Australia | Knee OA, Vit D deficient | 62.8              | 63.3                            | 93           | 106                             | 94          | 17.0 (4.7)                                      | 17.4 (5.0)  | 1667                                | 104              | 0.3 (2.1)                                       | 0.0 (2.4)      | 0.4     |
| Ghaderi <sup>13</sup>      | 2017 | Iran      | MMT                      | 42.5              | 40.1                            | NR           | 34                              | 34          | 13.9 (4.5)                                      | 13.5 (4.5)  | 3571                                | 12               | -2.2 (4.2)                                      | 2.0 (3.7)      | <0.001  |
| Mousa <sup>31</sup>        | 2017 | Australia | Obese/ Overweight        | 29.5              | 30.5                            | 35           | 28                              | 26          | 12.6 (5.0)                                      | 13.7 (4.0)  | 4893                                | 16               | -0.1 (1.4)                                      | -0.4 (2.3)     | 0.9     |
| Jamilian <sup>27</sup>     | 2017 | Iran      | PCOS                     | 25                | 26 (low dose)<br>28 (high dose) | 0            | 30 (low dose)<br>30 (high dose) | 30          | 12.6 (2.7) (high dose)<br>12.6 (3.4) (low dose) | 12.9 (2.4)  | 4000 (high dose)<br>1000 (low dose) | 12               | -0.7 (1.4) (high dose)<br>-0.5 (0.9) (low dose) | 0.5 (2.4)      | 0.01    |
| Maktabi <sup>14</sup>      | 2017 | Iran      | PCOS                     | 23.1              | 22                              | 0            | 35                              | 35          | 12.8 (4.5)                                      | 14.5 (5.1)  | 3571                                | 12               | -0.7 (1.4)                                      | 0.5 (2.1)      | 0.009   |
| Tabassi <sup>15</sup>      | 2017 | Iran      | Endometrial hyperplasia  | 43.2              | 41.5                            | 0            | 30                              | 30          | NR                                              | NR          | 3571                                | 12               | -1.7 (0.4)                                      | -0.2 (0.4)     | 0.007   |
| Sepehrmanesh <sup>17</sup> | 2016 | Iran      | MDD                      | 36.1              | 36.5                            | 6            | 20                              | 20          | 13.6 (7.9)                                      | 9.2 (6.0)   | 7142                                | 8                | 0.01 (1.0)                                      | 0.02 (1.7)     | 1.0     |
| Sollid <sup>23</sup>       | 2014 | Norway    | Prediabetes              | 61.9              | 62.3                            | 314          | 256                             | 255         | 24.0 (8.8)                                      | 24.4 (8.5)  | 2857                                | 52               | 2.7 (3.2)                                       | 3.1 (4.1)      | NS      |
| Raja-Khan <sup>22</sup>    | 2014 | USA       | PCOS                     | 28.7              | 28.2                            | 0            | 13                              | 15          | 19.9 (9.5)                                      | 22.2 (6.9)  | 12000                               | 12               | 0.9 (4.8)                                       | 2.0 (4.8)      | 0.6     |
| Zittermann <sup>25</sup>   | 2009 | Germany   | Overweight               | 48.8              | 47.4                            | 53           | 82                              | 83          | 30.0 (17.5)                                     | 30.3 (20.1) | 3332                                | 52               | -0.03 (0.5)                                     | -0.05 (0.7)    | 0.5     |

Data are presented as mean (SD). hsCRP, high-sensitivity C-reactive protein; 25-OH-D, 25-hydroxyvitamin D; IU, International Units; PCOS, Polycystic Ovarian Syndrome; OA, Osteoarthritis; MMT, Methadone Maintenance Treatment; MDD, Major Depressive Disorder; T2D, Type 2 Diabetes; NR, Not Reported; NS, Not Significant.

**Figure S1. Flow diagram detailing study selection for randomized-controlled trials included in the meta-analysis.**

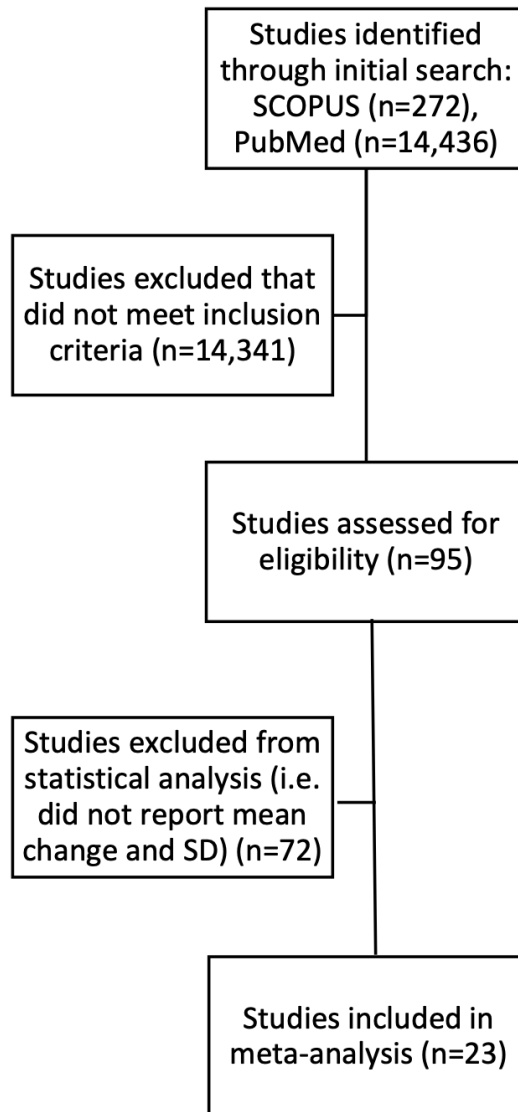



**Figure S2. Forest plots comparing effects of vitamin D supplementation on changes in LDL stratified by dose of vitamin D supplementation, mean baseline 25-hydroxyvitamin D concentration, duration of vitamin D supplementation, and diabetes status.**

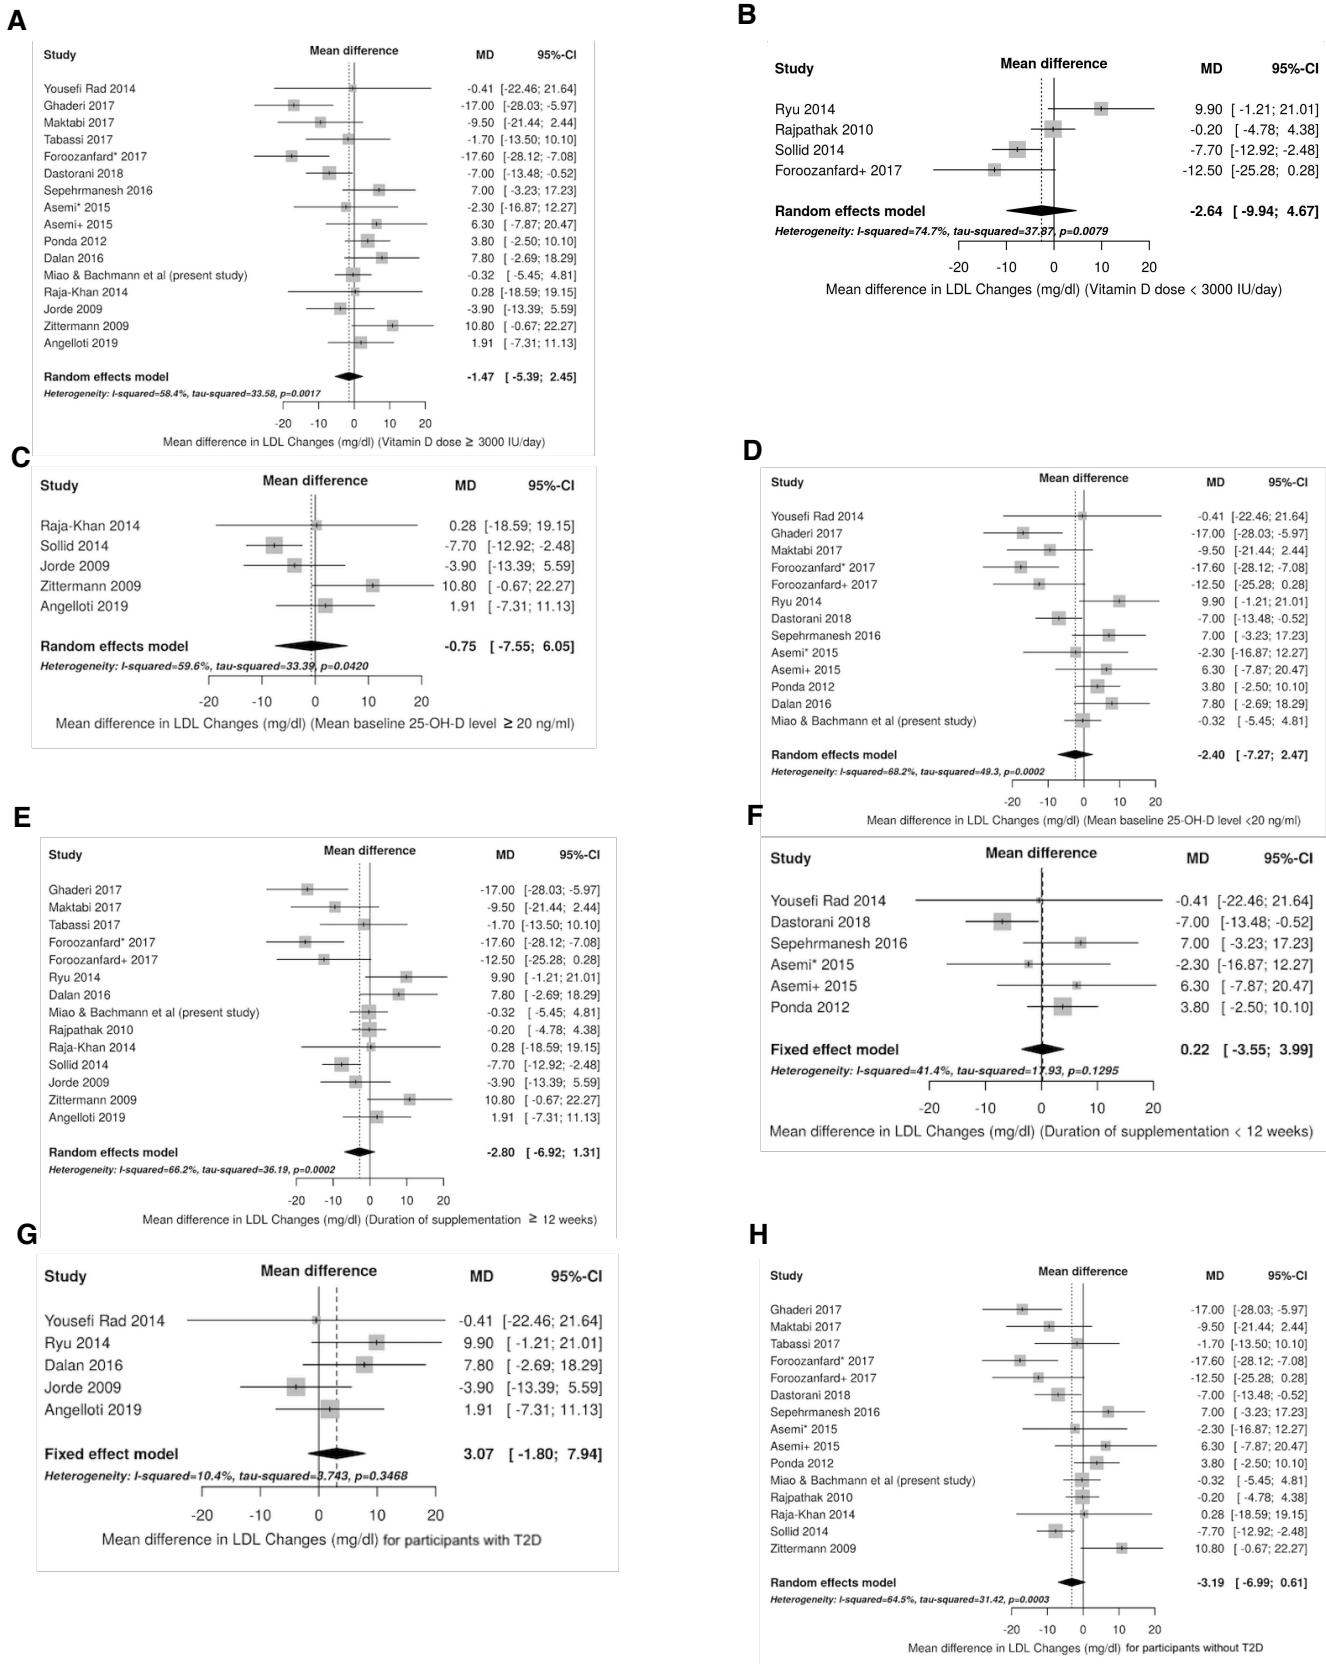

Subgroup analyses are presented for daily vitamin D supplementation dose  $\geq$  or  $<$  3000 IU/day (panels A and B, respectively), mean baseline 25-hydroxyvitamin-D level  $\geq$  or  $<$ 20 ng/ml (panels C and D, respectively), supplementation duration  $\geq$  or  $<$  12 weeks (panels E and F, respectively), and participants with or without T2D (panels G and H, respectively). Meta-analysis was not performed for subgroups consisting of 2 or fewer studies. The gray boxes correspond with study precision, lines denote 95% CI. MD, mean difference; IU, International Units; 25-OH-D, 25-hydroxyvitamin D; T2D, Type 2 Diabetes; LDL, Low-density Lipoprotein.

**Figure S3. Forest plots comparing effects of vitamin D supplementation on changes in HOMA-IR stratified by dose of vitamin D supplementation, mean baseline 25-hydroxyvitamin D concentration, duration of vitamin D supplementation, and diabetes status.**

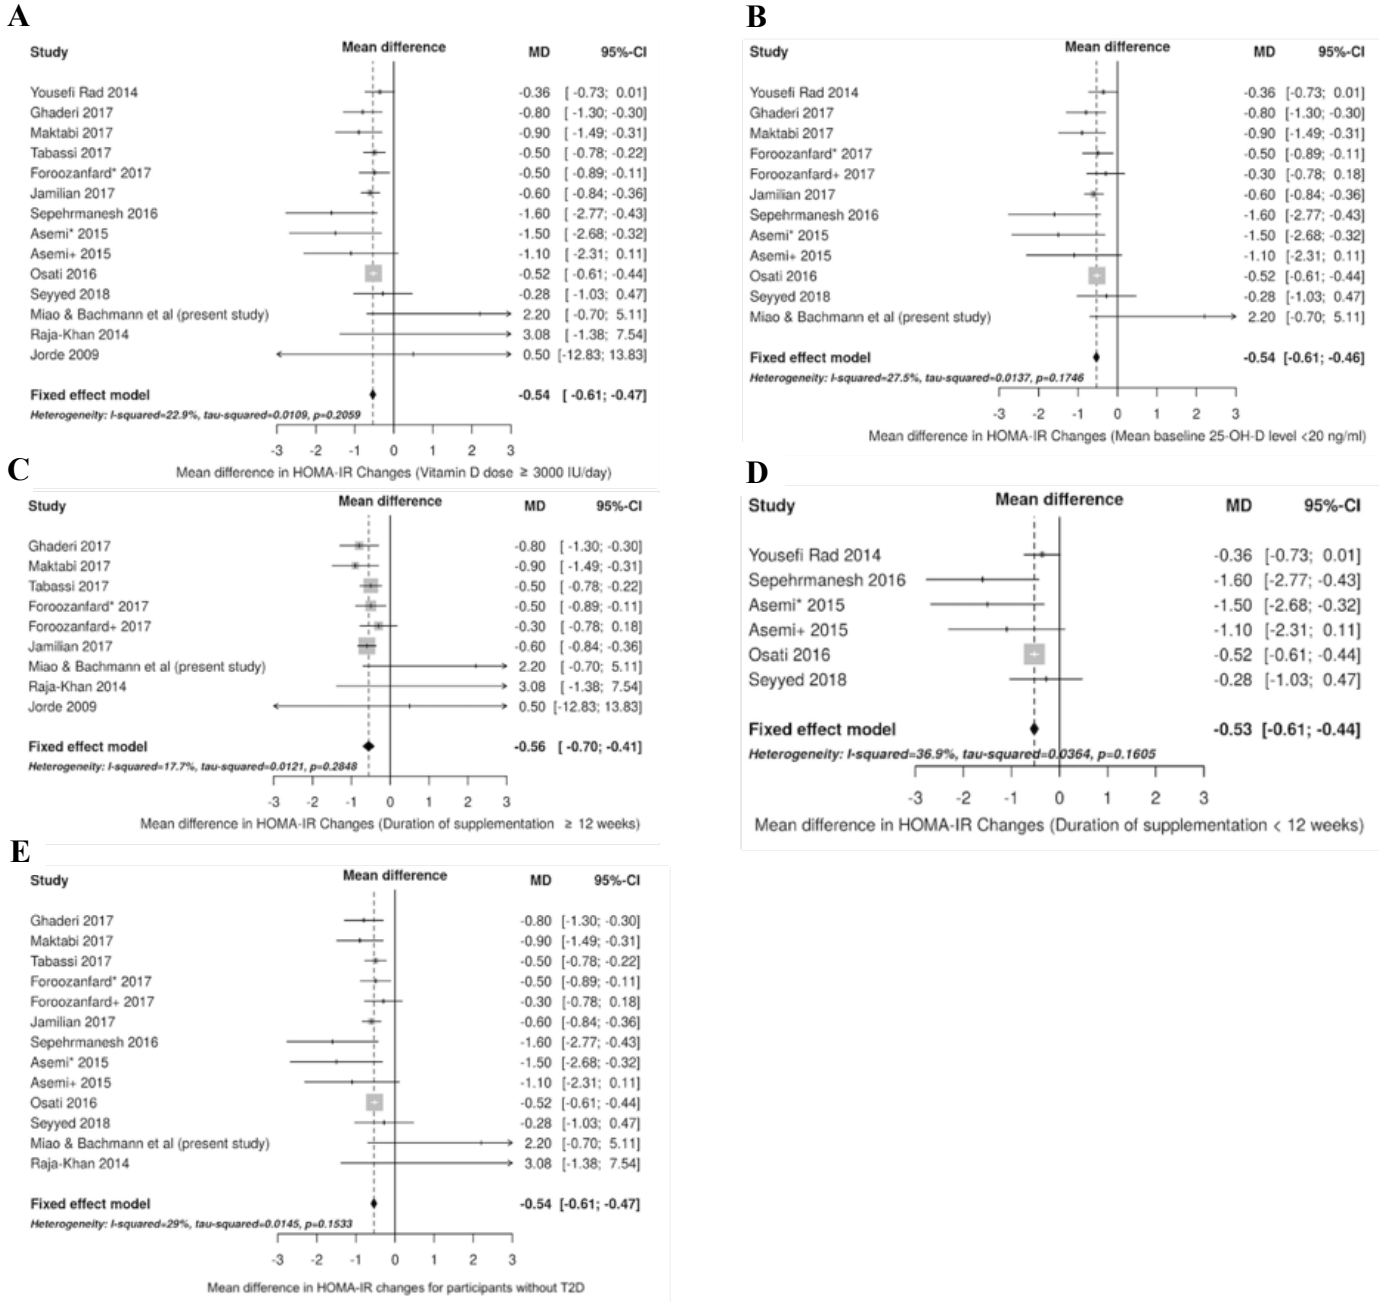

Subgroup analyses are presented for daily vitamin D supplementation dose  $\geq 3000$  IU/day (panel A), mean baseline 25-hydroxyvitamin-D level  $< 20$  ng/ml (panel B), supplementation duration  $\geq$  or  $< 12$  weeks (panels C and D, respectively), and participants without T2D (panel E). Meta-analysis was not performed for subgroups consisting of 2 or fewer studies. The gray boxes correspond with study precision, lines denote 95% CI. MD,

mean difference; IU, International Units; 25-OH-D, 25-hydroxyvitamin D; T2D, Type 2 Diabetes; HOMA-IR, Homeostatic Model Assessment of Insulin Resistance. Foroozanfard\*, Vitamin D 4000 IU daily; Foroozanfard+, Vitamin D 1000 IU daily; Asemi\*, Vitamin D 50,000 IU weekly + calcium 1000 mg daily; Asemi+, Vitamin D 50,000 IU weekly.

**Figure S4. Forest plots comparing effects of vitamin D supplementation on changes in hsCRP between studies included in the meta-analysis stratified by dose of vitamin D supplementation, mean baseline 25-hydroxyvitamin D concentration, duration of vitamin D supplementation, and diabetes status.**

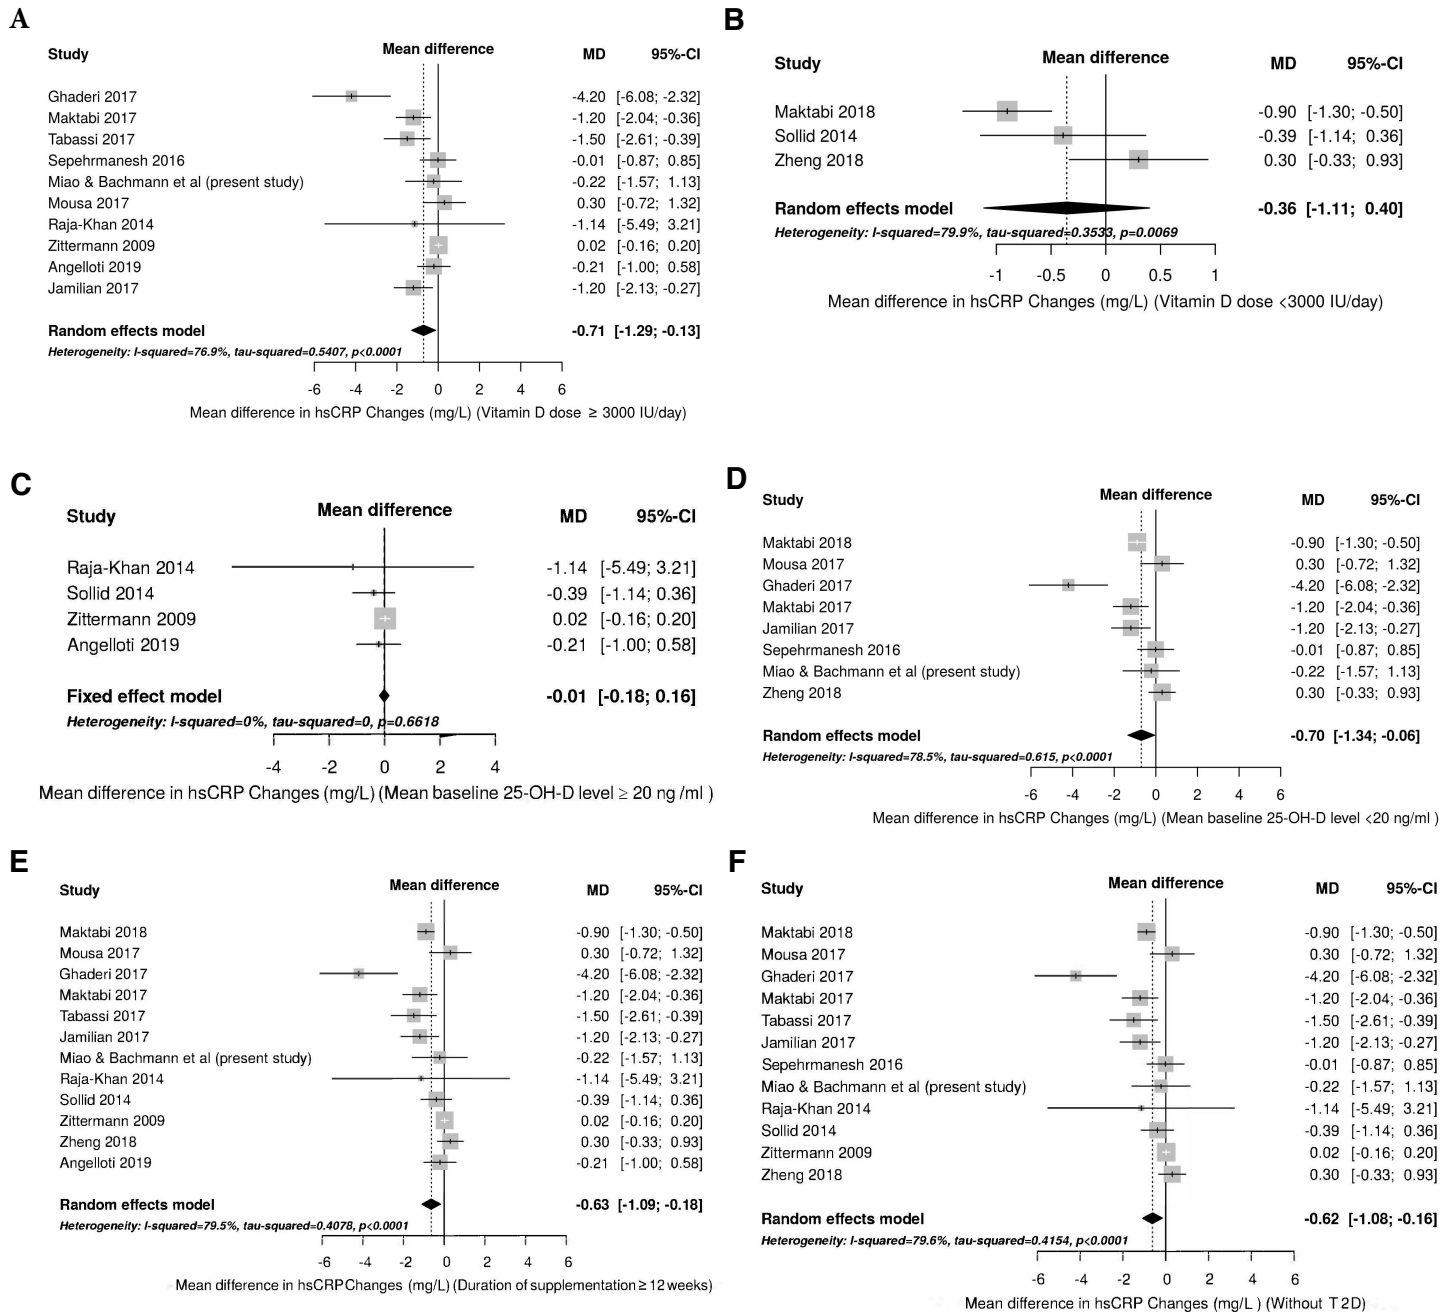

Subgroup analyses are presented for daily vitamin D supplementation dose  $\geq$  or < 3000 IU/day (panels A and B, respectively), mean baseline 25-OH-D level  $\geq$  or < 20 ng/ml (panels C and D, respectively), supplementation duration  $\geq$  12 weeks (panel E), and participants without T2D (panel F). Meta-analysis was not performed for subgroups consisting of 2 or fewer studies. The gray boxes correspond with study precision, lines denote 95%

CI, MD, mean difference; IU, International Units; 25-OH-D, 25-hydroxyvitamin D; T2D, Type 2 Diabetes; hsCRP, high-sensitivity C-reactive protein.
